# Supplementary material for: Structuring 3D-printed polypropylene composites with vertically aligned mesophase pitch-based carbon fibers for enhanced through-plane thermal conductivity and mechanical properties
Source: Royal Society of Chemistry journal article supplement (doi:10.1039/d4mh01521e), 2025-01-01
Supplement: d4mh01521e1.pdf [file d4mh01521e1.pdf]

## Supplementary information

### Structuring 3D-Printed Polypropylene Composites with Vertically Aligned Mesophase Pitch-based Carbon Fibers for Enhanced Through-Plane Thermal Conductivity and Mechanical Properties

*Bowen Fang<sup>a</sup>, Yan Wang<sup>a\*</sup>, Hongjia Fan<sup>a</sup>, Yumei Gong<sup>a</sup>, Jing Guo<sup>a</sup>, Zhiguo Wang<sup>b</sup>,*

*Jiazhuang Xu<sup>b</sup>, Shengfa Wang<sup>c</sup>*

<sup>a</sup> School of Textile and Material Engineering, Dalian Polytechnic University, Dalian 116034, China

<sup>b</sup> College of Polymer Science and Engineering, State Key Laboratory of Polymer Materials Engineering, Sichuan University, Chengdu 610065, China

<sup>c</sup> DUT School of Software Technology & DUT-RU International School of Information Science and Engineering, Dalian University of Technology, Dalian 116620, China

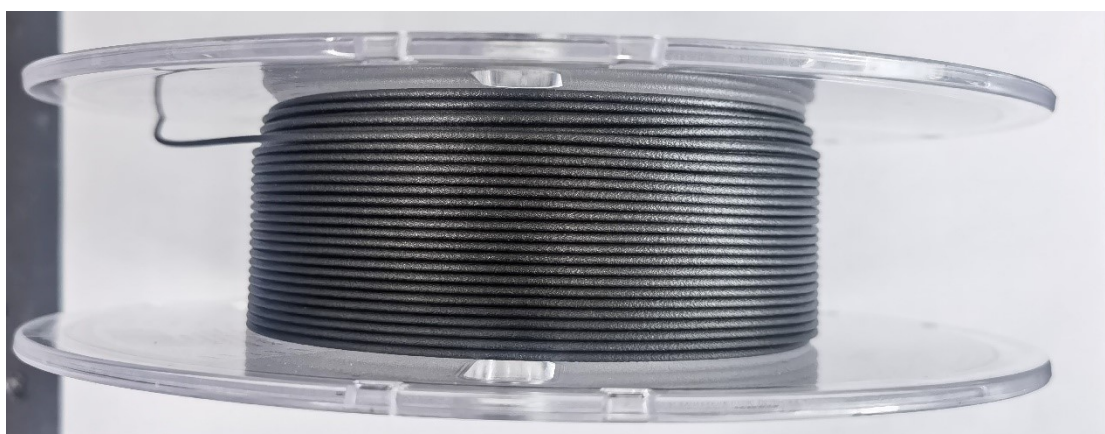

**Figure S1.** The CF/PP filaments with a uniform diameter of 1.75mm.

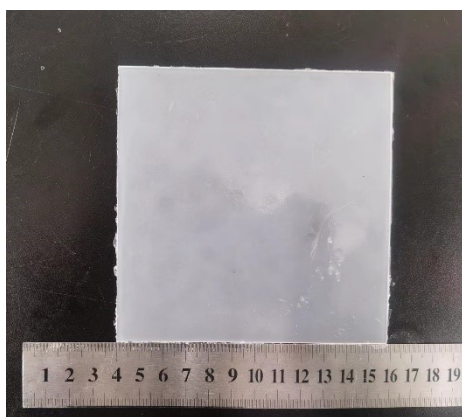

**Figure S2.** A  $120 \times 120 \times 1.5$  mm PP substrate.

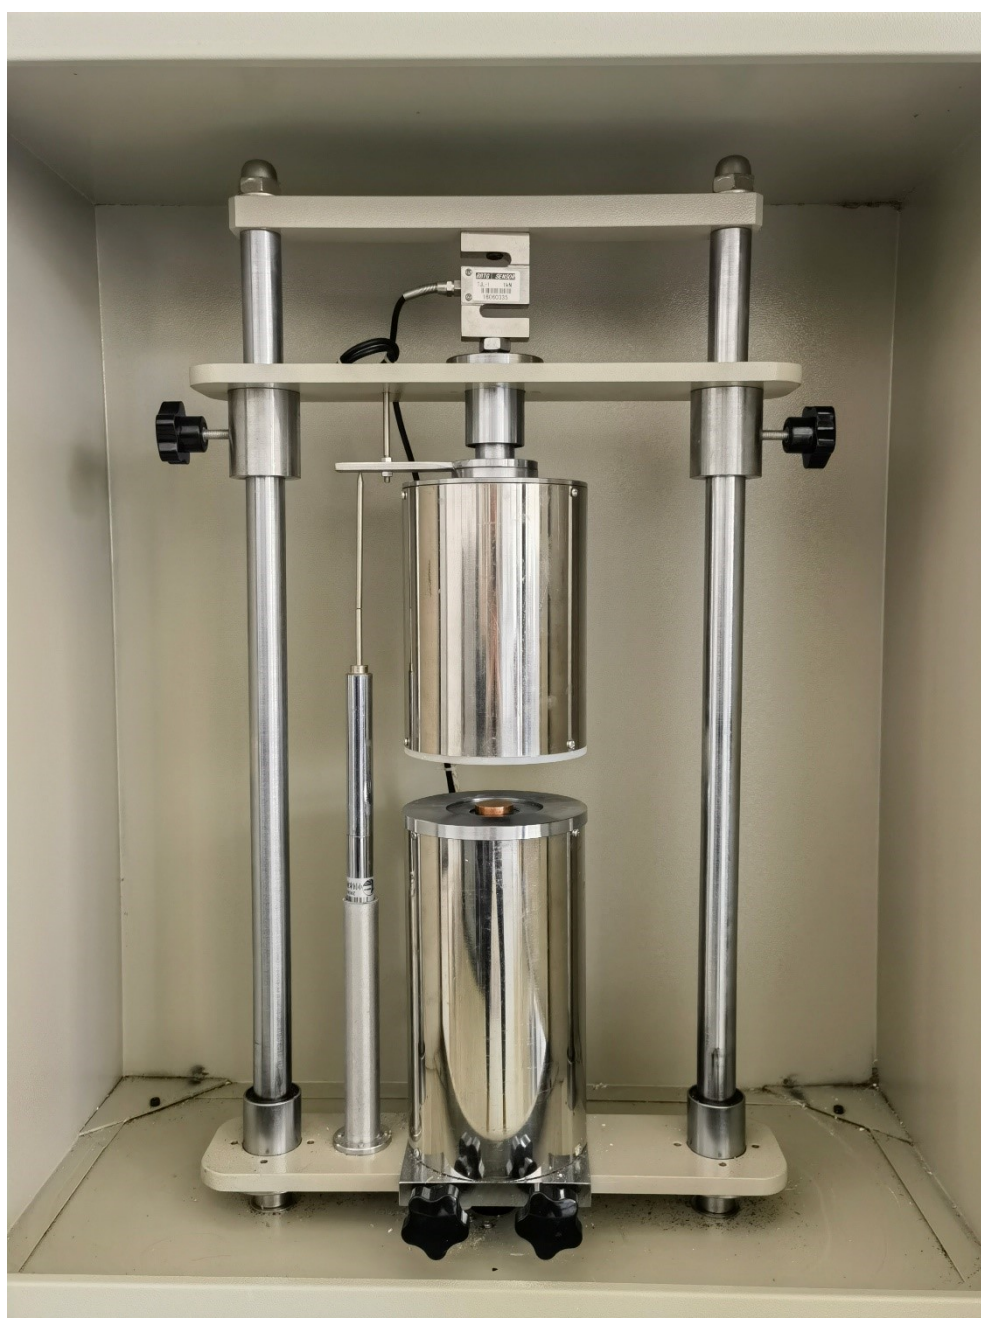

**Figure S3.** DR-III thermal conductivity instrument with heat-flow method.

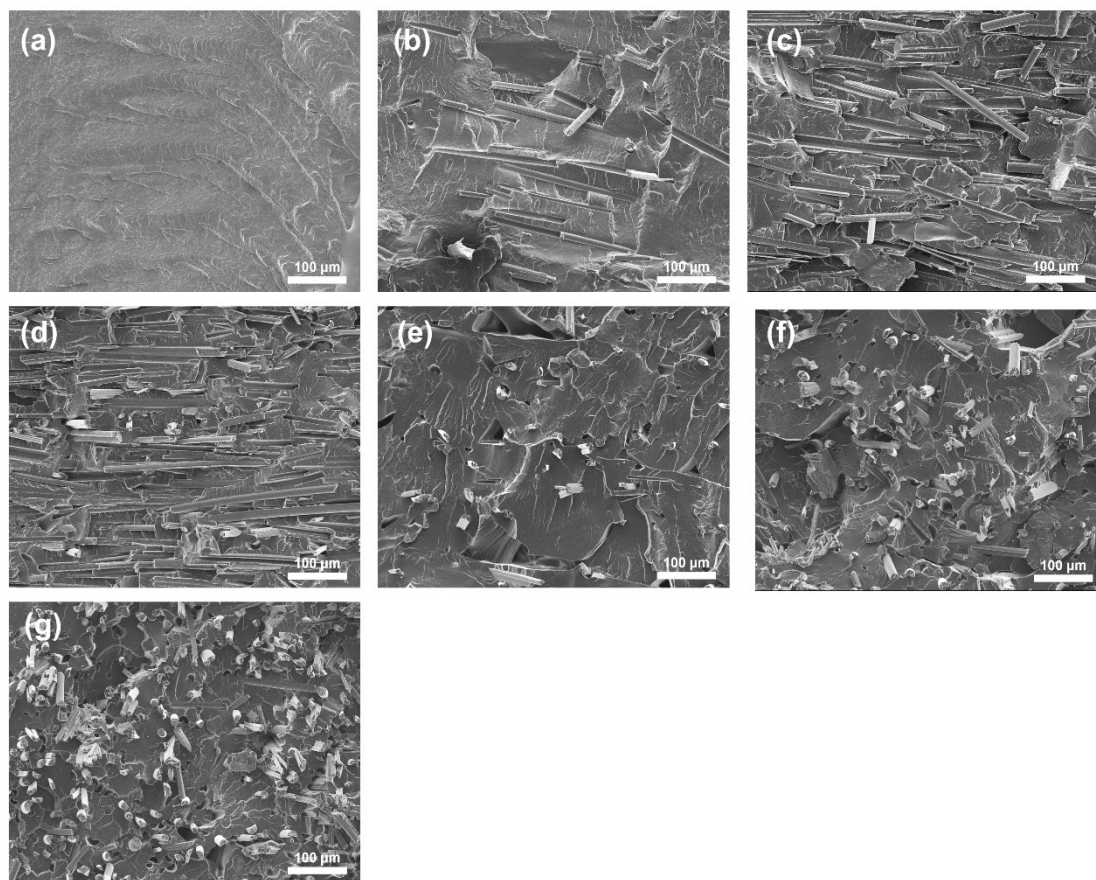

**Figure S4.** (a) Cross-sectional morphology of PP. (b-d) Cross-sectional morphology of H-CF/PP with CF contents of 4, 9, and 15 vol%, respectively. (e-g) Cross-sectional morphology of V-CF/PP with CF contents of 4, 9, and 15 vol%, respectively.

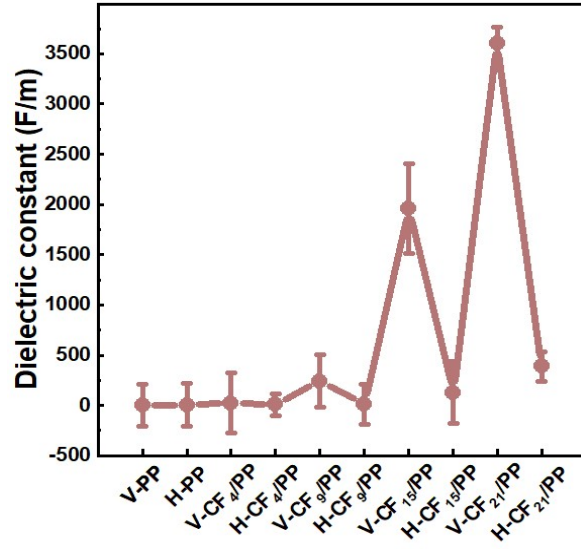

**Figure S5.** The dielectric constant of 3D printed CF/PP composites.

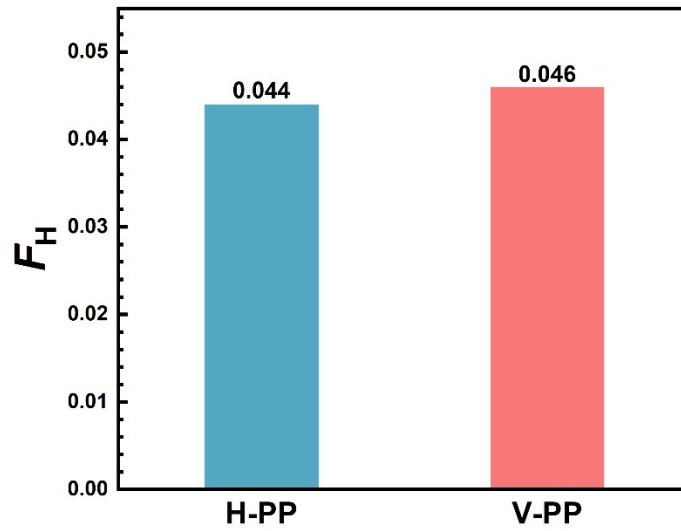

**Figure S6.** The  $F_H$  of CF/PP composites from 2D WAXD patterns.

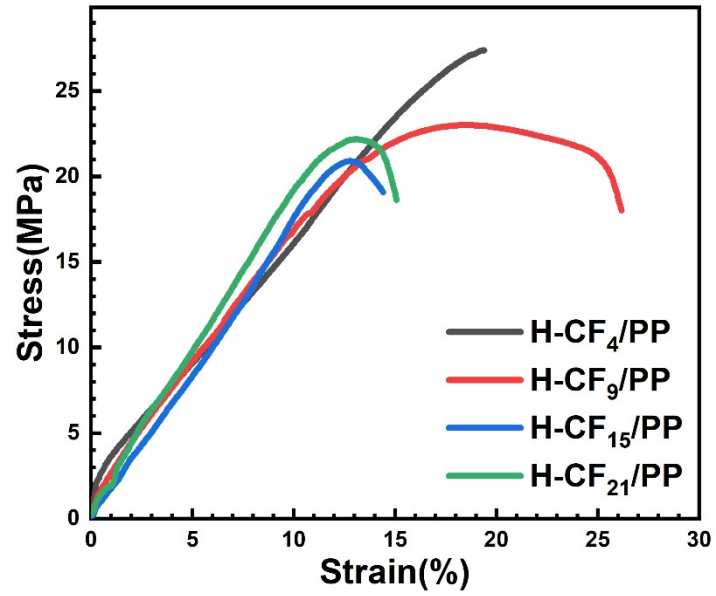

**Figure S7.** Stress-strain curves of H-CF/PP composites with varying CF loading.

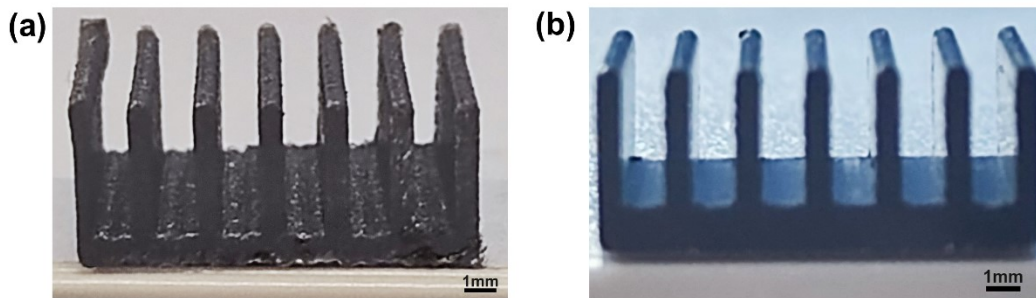

**Figure S8.** Digital photos of different printing direction of CF/PP composites: (a) V-CF<sub>21</sub>/PP and (b) commercialized product.



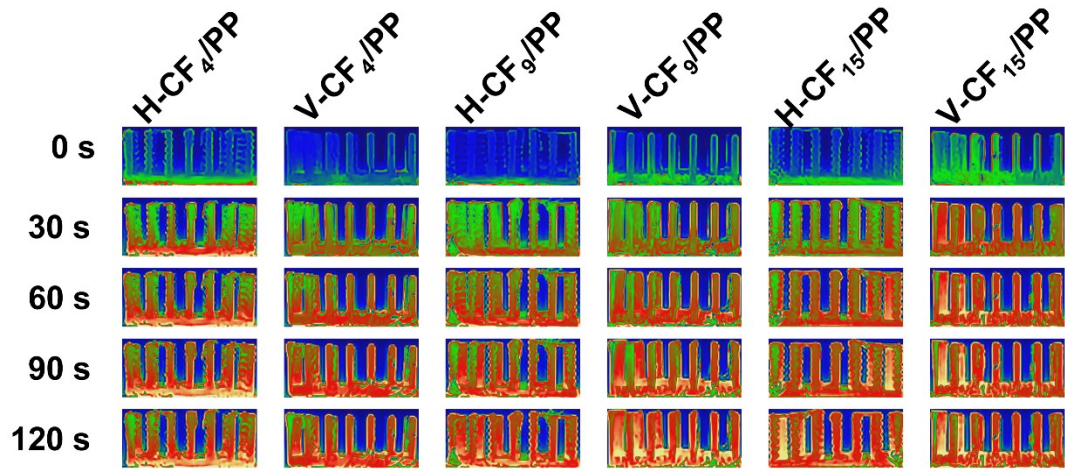

**Figure S9.** Infrared thermography of 3D-CF/PP composite material with varying CF loading.

**Table S1** FDM parameters used for the 3D printing of CF/PP scaffold.

| Parameters                    | Value                 |
|-------------------------------|-----------------------|
| Print nozzle diameter (mm)    | 0.4                   |
| Layer height (mm)             | 0.4                   |
| Nozzle temperature (°C)       | 200                   |
| Printing bed temperature (°C) | 70                    |
| Feed rate (mm/s)              | 30                    |
| Infill pattern                | Linear infill pattern |
| Print infill (%)              | 100                   |

**Table S2** Values of melting temperatures, melting enthalpies and degree of crystallinity temperatures for CF/PP composites obtained by DSC analysis.

| Sample               | Melting temperature (°C) | Enthalpy (J/g) | Degree of crystallinity (%) |
|----------------------|--------------------------|----------------|-----------------------------|
| PP                   | 149.09                   | 61.62          | 29.77                       |
| CF <sub>4</sub> /PP  | 148.74                   | 52.25          | 25.24                       |
| CF <sub>9</sub> /PP  | 147.16                   | 46.04          | 22.24                       |
| CF <sub>15</sub> /PP | 147.43                   | 44.46          | 21.48                       |
| CF <sub>21</sub> /PP | 151.19                   | 39.96          | 19.30                       |

**Table S3** Values of initial decomposition temperature, peak temperature and residual CF rate for CF/PP composites obtained by thermogravimetric analysis.

| Sample               | Initial decomposition temperature (°C) | Peak temperature (°C) | Residual CF rate (%) |
|----------------------|----------------------------------------|-----------------------|----------------------|
| PP                   | 392.02                                 | 432.50                | 1.36                 |
| CF <sub>4</sub> /PP  | 421.94                                 | 450.00                | 7.78                 |
| CF <sub>9</sub> /PP  | 431.45                                 | 455.83                | 26.10                |
| CF <sub>15</sub> /PP | 437.16                                 | 461.67                | 31.20                |
| CF <sub>21</sub> /PP | 437.58                                 | 461.68                | 39.80                |
